# Supplementary material for: Halide sublattice dynamics drive Li-ion transport in antiperovskites
Source: Royal Society of Chemistry journal article supplement (doi:10.1039/d2ta02598a), 2022-01-01
Supplement: d2ta02598a2.pdf [file d2ta02598a2.pdf]

## SUPPORTING INFORMATION

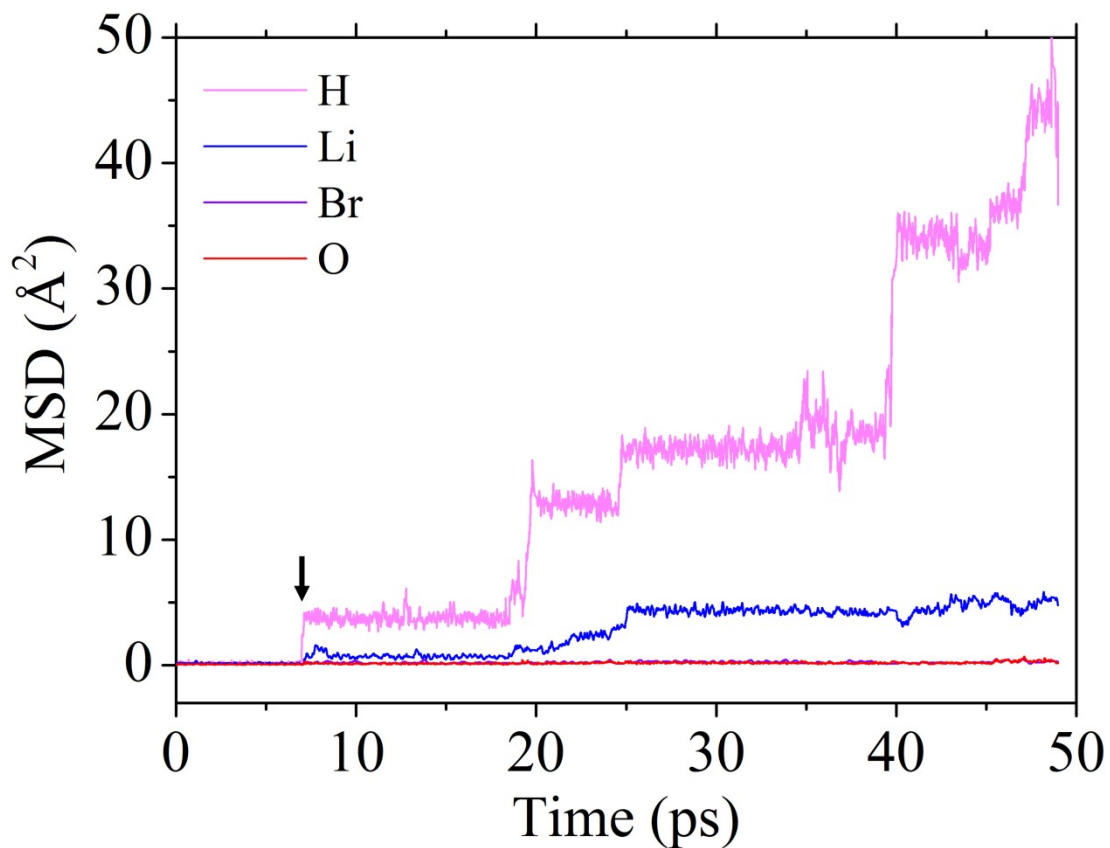

**Figure S1.** Calculated mean squared displacements of all the atomic species in the model structure of  $\text{Li}_2\text{OHBr}$  using data from molecular dynamics simulations at a simulating temperature of 300 K (see Method). After about 7 ps into the simulation (indicated by the black arrow), hydroxide ions start decomposition, leading to proton fast-ion conduction.

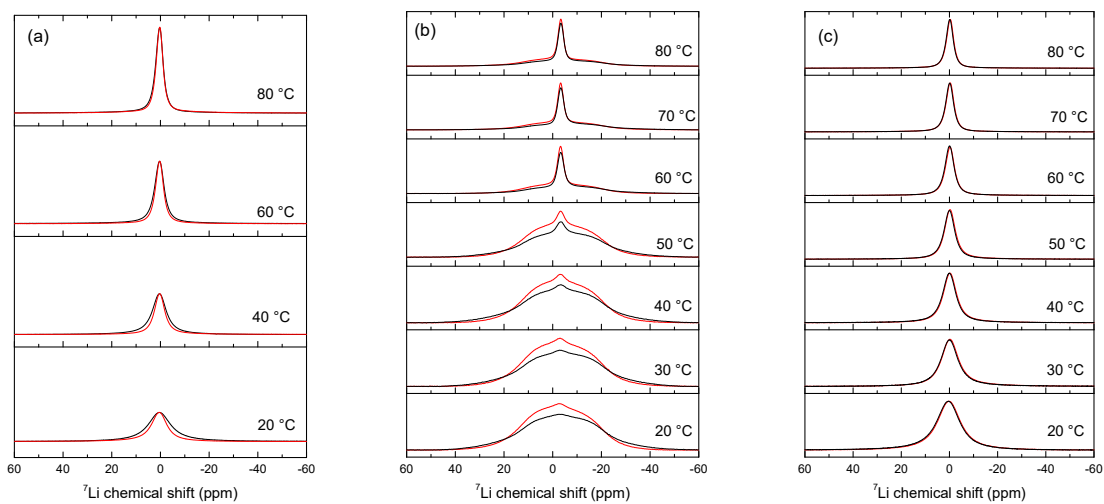

**Figure S2.** Temperature-dependent  ${}^7\text{Li}$  NMR spectra with ( $S_{\text{Li-H}}$ , red) and without ( $S_{\text{Li}}$ , black) proton decoupling for (a)  $\text{Li}_2\text{OHCl}_{0.37}\text{Br}_{0.63}$ , (b)  $\text{Li}_2\text{OHCl}$ , and (d)  $\text{Li}_2\text{OHBr}$ .

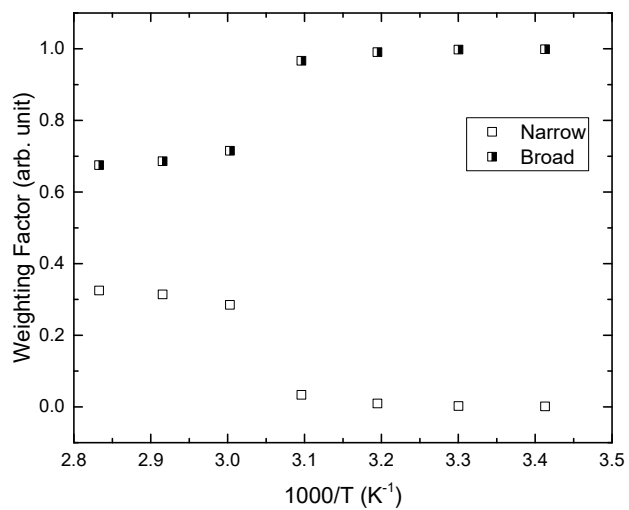

**Figure S3.** Temperature-dependent weighing factor obtained from  $S_{\text{Li}}$  of  $\text{Li}_2\text{OHCl}$  plotted in Figure S2(b).

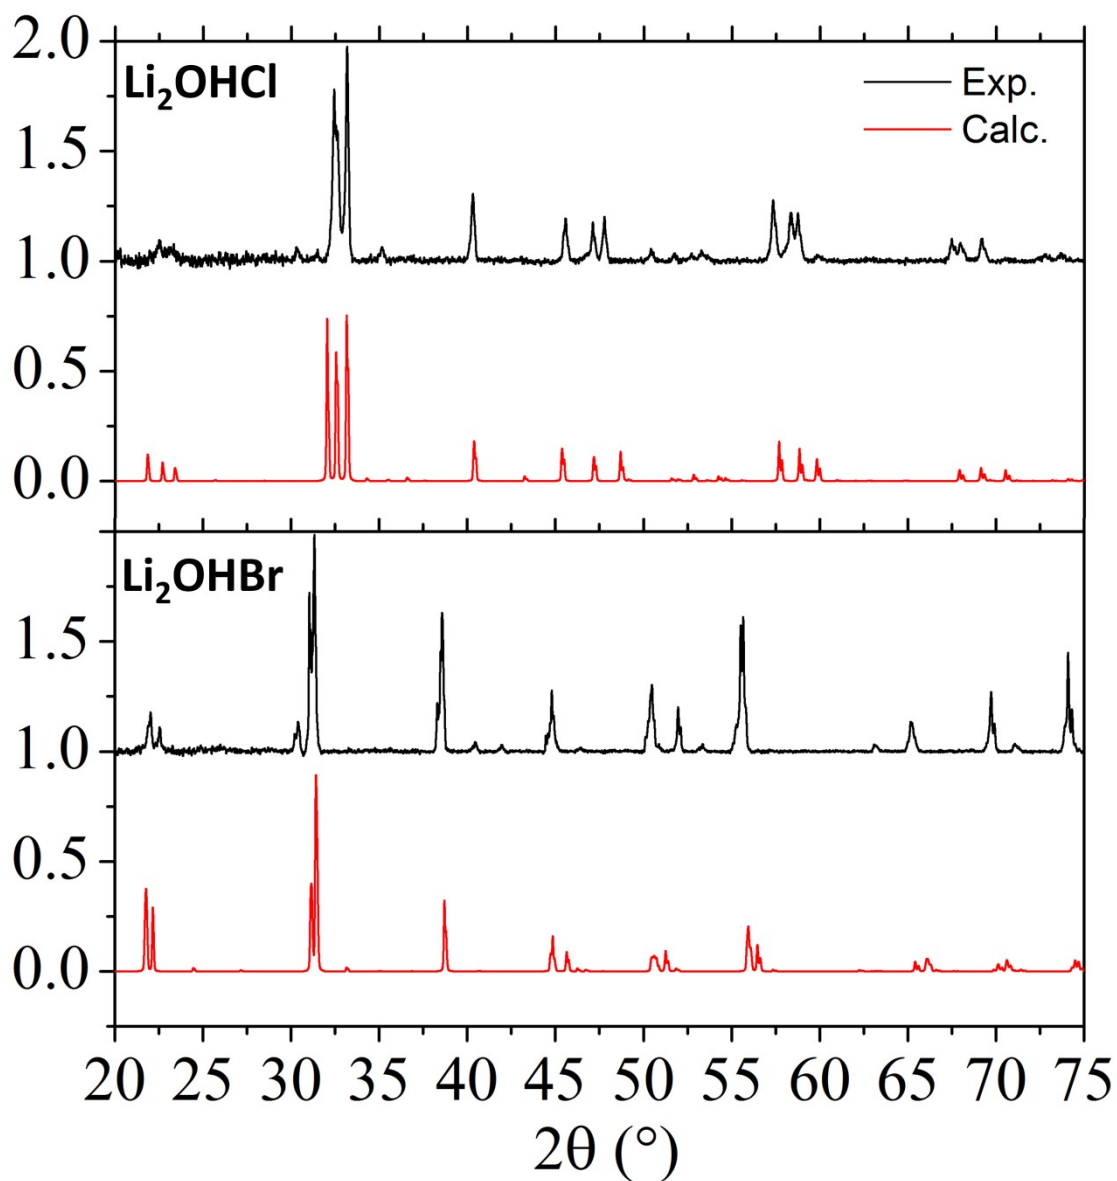

**Figure S4.** Simulated XRDs from the optimized structural model of  $\text{Li}_2\text{OHX}$  ( $\text{X}=\text{Cl}, \text{Br}$ ) agree well with the measured ones.

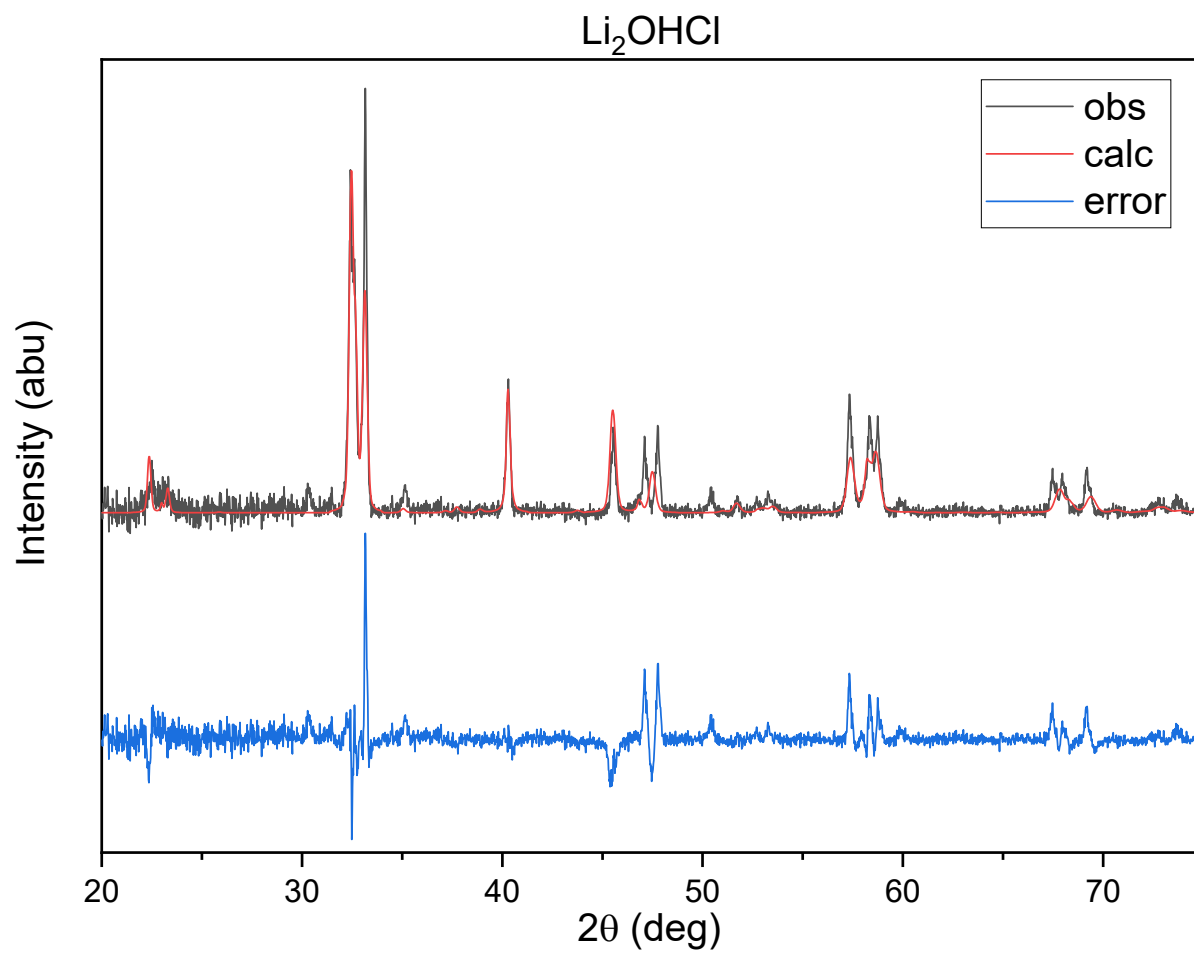

**Figure S5.** XRD of  $\text{Li}_2\text{OHCl}$  is primarily orthorhombic

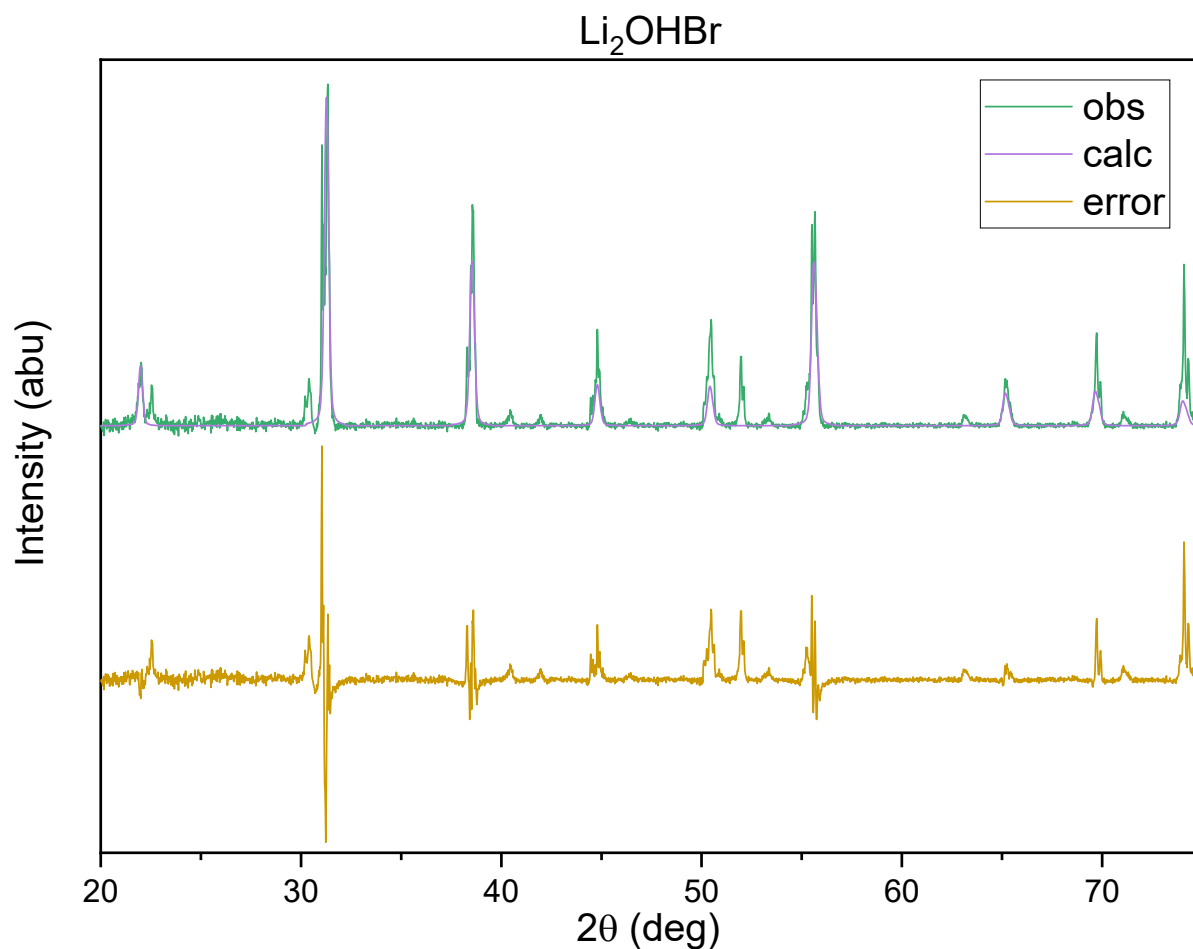

**Figure S6.** XRD of  $\text{Li}_2\text{OHBr}$  in cubic phase

**Table S1.** Lattice parameters (LP) and Li-Halide bond lengths (BL) of the DFT optimization compared to those of experiment. For the cubic phase, the DFT optimization is carried out with atomic position relaxation and the experimental lattice parameters.

| Antiperovskites                                 | LP (Å)                       |                   | BL (Å)          |                                            |
|-------------------------------------------------|------------------------------|-------------------|-----------------|--------------------------------------------|
|                                                 | Exp.                         | DFT               | Exp.            | DFT                                        |
| $\text{Li}_2\text{OHCl}$                        | 3.828/3.877/7.999<br>(Ortho) | 3.697/3.890/7.922 | 2.664-<br>2.785 | 2.386-2.747                                |
| $\text{Li}_2\text{OHBr}$                        | 4.044<br>(Cubic)             | 4.044             | 2.862           | 2.499-3.237                                |
| $\text{Li}_2\text{OHCl}_{0.37}\text{Br}_{0.63}$ | 3.997<br>(Cubic)             | 3.997             | 2.831           | 2.389-<br>2.511(Cl)<br>2.557-<br>2.947(Br) |
